# Supplementary material for: The genetic and genomic background of multiple myeloma patients achieving complete response after induction therapy with bortezomib, thalidomide and dexamethasone (VTD)
Source: PubMed Central journal article supplement (PMC4891075; doi:10.18632/oncotarget.5718), 2015-11-09
Supplement: oncotarget-07-09666-s001.pdf [file oncotarget-07-09666-s001.pdf]

## SUPPLEMENTARY TABLE

**Supplementary Table S1: list of probe sets significantly differentially expressed in CR vs NR patients, filtered according to the GeneGo® “haematological disease” category**
